# Supplementary material for: The Effect of Statin on Anemia in Patients with Chronic Kidney Disease and End-Stage Kidney Disease: A Systematic Review and Meta-Analysis
Source: J Pers Med. 2022 Jul 19;12(7):1175. doi: 10.3390/jpm12071175 (PMC9317421; doi:10.3390/jpm12071175)
Supplement: Supplementary file 1 [file jpm-12-01175-s001.zip]

Archive with 4 entries (4 files):
- Analysis data.xlsx
- Key words_Mesh terms  .pdf
- PRISMA 2020 checklist.pdf
- Supplementary Figures.pdf
