# Supplementary material for: The Effect of Statin on Anemia in Patients with Chronic Kidney Disease and End-Stage Kidney Disease: A Systematic Review and Meta-Analysis
Source: J Pers Med. 2022 Jul 19;12(7):1175. doi: 10.3390/jpm12071175 (PMC9317421; doi:10.3390/jpm12071175)
Supplement: Supplementary file 1 [file jpm-12-01175-s001.zip › Analysis data.xlsx]

## Sheet: 工作表1
Supplementary Document S3: Analysis data.
ERI
		(Treatment)				(Control)
Study	TxN	Baseline	Endpoint	Change	CxN	Baseline	Endpoint	Change
Nand	15	38.67±11.33	26.81±5.71		15	43.62±12.18	39.67±9.78
Tsouchnikas	25	8.34±3.7	7.87±3.1		X	X	X
Sirken	19	10.63±7.62#	6.72±4.77#		X	X	X
Mallick	1305	15±14.08	X		X	X	X
# Calculated via formula : (weekly erythropoietin/weight)/Hb
Ferritin
		(Treatment)				(Control)
Study	TxN	Baseline	Endpoint	Change	CxN	Baseline	Endpoint	Change	Change (SE)
Nand	15	615.60±261.04	486.13±135.84	-129.47±355.02	15	614.00±407.11	599.00±223.69	-15±418.55	108.069
Tsouchnikas	25	443.3 ± 203.3	526.5 ± 202.9		X	X	X
Sirken	19	618 ± 334.1	334 ±265		X	X	X
Masajtis	18	182±23	179±45	– 3.19 ± 77.2	18	172±24	170±39	-2.0±50.3	11.8558
KOC	70	591.33 ± 276.30	591.67 ± 302.22		1293	649.67 ± 491.11	678.33 ± 482.22
Hb
		(Treatment)				(Control)
Study	TxN	Baseline	Endpoint	Change	CxN	Baseline	Endpoint	Change	Change (SE)
Nand	15	6.36±0.81	8.96±0.55	2.60±0.32	15	6.50±1.05	7.04±0.79	0.14±0.68	0.175575
Tsouchnikas	25	12.1 ± 1.1	12.6±0.7		X	X	X
Sirken	19	10.61 ± 1.2	12.48 ±0.79		X	X	X
KOC	70	11.1 ± 1.4	11.1 ± 1.0	0±0.52	1293	10.8 ± 1.6	11.0 ± 1.2	0.2±1.03	0.0286443
Masajtis	18	11.6± 1.6	11.9± 1.5	0.24 ± 0.44	18	11.7±1.3	11.8±1.3	0.18±0.89	0.209775
Li	47	11.7±0.33	11.5±0.28	-0.2±0.1	44	11.5±0.38	10.7±0.36	-0.8±0.25	0.0376889

## Sheet: 工作表2
	Ferritin(control)
	SD baseline	SD endpoint	SD change			Corr (control)
	24	39	50.3	-433.09	1872	-0.231351
nand	407.11	223.69	507.851	215776	-42136.7	257912
KOC	491.11	482.22	763.743	473725	-109579	583304
	Hb
	1.3	1.3	0.89	2.5879	3.38	0.765651
nand	1.05	0.79	0.675563	1.7266	1.27021	0.456385
KOC	1.6	1.2	1.02951	4	2.9401	1.0599
Li	0.38	0.36	0.254004	0.274	0.209482	0.0645179
	Ferritin(Experiment)
	SD baseline	SD endpoint	SD change			Corr (exp)
	23	45	77.2	-3405.84	2070	-1.64533
nand	261.04	135.84	450.866	86594.4	-116686	203280
	Hb
	1.6	1.5	0.44	4.6164	4.8	0.96175
nand	0.81	0.55	0.318874	0.9586	0.856919	0.101681
KOC	1.4	1	0.516817	2.96	2.6929	0.2671
Li	0.33	0.28	0.0978192	0.1873	0.177731	0.0095686
